# Supplementary material
Source: PubMed Central journal article supplement (PMC4549797)
Supplement: NIHMS710439-supplement-supplement_1.pdf [file NIHMS710439-supplement-supplement_1.pdf]

Supplementary Table 1. Psoriasis Patient Characteristics<sup>a</sup>

| Characteristic                                                                | Number (%)<br>N=4,096 |
|-------------------------------------------------------------------------------|-----------------------|
| Age, mean (SD)                                                                | 70.2 (12.2)           |
| Age (category)                                                                |                       |
| <65                                                                           | 804 (19.6)            |
| 65–69                                                                         | 898 (21.9)            |
| 70–74                                                                         | 904 (22.1)            |
| 75–79                                                                         | 659 (16.1)            |
| ≥80                                                                           | 831 (20.3)            |
| Sex, male                                                                     | 1,720 (42.0)          |
| Race                                                                          |                       |
| White                                                                         | 3,688 (90.0)          |
| Black                                                                         | 185 (4.5)             |
| Latino                                                                        | 66 (1.6)              |
| Other/Unknown                                                                 | 157 (3.8)             |
| Census Region                                                                 |                       |
| Northeast                                                                     | 923 (22.5)            |
| Midwest                                                                       | 945 (23.1)            |
| South                                                                         | 1,523 (37.2)          |
| West                                                                          | 688 (16.8)            |
| County-Level Characteristics                                                  |                       |
| Income, per capita/10,000, mean (SD)                                          | 4.1 (1.3)             |
| County poverty rate, <sup>b</sup> mean (SD)                                   | 15.1 (5.1)            |
| Residence in Urban County                                                     | 3355 (82.4)           |
| Residence in County with Low Educational Level <sup>c</sup>                   | 452 (11.1)            |
| Number of primary care providers <sup>d</sup> per 10,000 residents, mean (SD) | 6.5 (3.0)             |
| Number of dermatologists per 100,000 residents, mean (SD)                     | 4.0 (3.7)             |
| Medicare eligibility                                                          |                       |
| Aged                                                                          | 2,952 (72.1)          |
| Disabled                                                                      | 804 (19.6)            |
| Aged plus disabled                                                            | 340 (8.3)             |
| Low-income subsidy (LIS) status                                               |                       |
| Full                                                                          | 1,207 (29.5)          |
| Partial                                                                       | 36 (0.88)             |
| None                                                                          | 2,821 (68.9)          |
| Mixed                                                                         | 32 (0.78)             |
| <b>Comorbidities</b>                                                          |                       |
| AIDS/HIV                                                                      | 12 (0.29)             |
| Autoimmune disease                                                            |                       |
| Ankylosing spondylitis                                                        | 60 (1.5)              |
| Inflammatory bowel disease                                                    | 44 (1.1)              |
| Rheumatoid arthritis                                                          | 175 (4.3)             |

|                                                                                                                         |              |
|-------------------------------------------------------------------------------------------------------------------------|--------------|
| Rheumatologic disease                                                                                                   | 246 (6.0)    |
| Cardiometabolic disease                                                                                                 |              |
| Cerebrovascular disease                                                                                                 | 370 (9.0)    |
| Congestive heart failure                                                                                                | 373 (9.1)    |
| Diabetes                                                                                                                | 1,285 (31.4) |
| Dyslipidemia                                                                                                            | 2,571 (62.8) |
| Hypertension                                                                                                            | 2,707 (66.1) |
| Myocardial infarction                                                                                                   | 103 (2.5)    |
| Obesity                                                                                                                 | 262 (6.4)    |
| Peripheral vascular disease                                                                                             | 517 (12.6)   |
| Atherosclerotic outcomes (aggregate of cerebrovascular disease, myocardial infarction, and peripheral vascular disease) | 852 (20.8)   |
| Hemiplegia or paraplegia                                                                                                | 38 (0.93)    |
| Liver disease                                                                                                           |              |
| Mild liver disease                                                                                                      | 165 (4.0)    |
| Moderate to severe liver disease                                                                                        | 18 (0.44)    |
| Malignant disease                                                                                                       |              |
| Cancer                                                                                                                  | 519 (12.7)   |
| Metastatic solid tumor                                                                                                  | 26 (0.63)    |
| Neuropsychiatric disease                                                                                                |              |
| Dementia                                                                                                                | 64 (1.6)     |
| Depression                                                                                                              | 524 (12.8)   |
| Peptic ulcer disease                                                                                                    | 39 (1.0)     |
| Psoriatic arthritis                                                                                                     | 255 (6.2)    |
| Pulmonary disease, chronic                                                                                              | 816 (19.9)   |
| Renal disease                                                                                                           | 346 (8.4)    |
| <b>Non-Psoriasis Medications</b>                                                                                        |              |
| Number of 30-day supply equivalent prescriptions for non-psoriasis medications, mean (SD)                               | 4.5 (3.3)    |
| <b>Type of Medicare Part D Plan<sup>e</sup></b>                                                                         |              |
| Basic                                                                                                                   | 2,923 (71.4) |
| Enhanced Alternative                                                                                                    | 862 (21.0)   |
| Unknown                                                                                                                 | 311 (7.6)    |
| RxHCC score, mean (SD)                                                                                                  | 0.89 (0.54)  |

AIDS, acquired immune deficiency syndrome; HIV, human immunodeficiency virus; LIS, low-income subsidy; RxHCC, prescription drug hierarchical condition category risk score; SD, standard deviation.

<sup>a</sup>Psoriasis is defined by at least one inpatient or outpatient claim for psoriasis (ICD-9-CM 696.1) by a dermatologist.

<sup>b</sup>County poverty rate is defined as the percentage of persons in the county living in poverty.

<sup>c</sup>County with low educational level is defined by at least 25% of residents not having a high school diploma or general educational development (GED) in the patient's county of residence.

<sup>d</sup>Primary care providers included medical providers practicing in the fields of general family medicine, general practice, and general internal medicine.

<sup>e</sup>Basic plans include defined standard benefit, actuarially equivalent standard, and basic alternative type of Part D plans. Enhanced plans include enhanced alternative type of Part D plans.

**Supplementary Table 2. Psoriasis Therapy Prevalence<sup>a</sup>**

| <b>Therapy</b>                  | <b>Number (%)<sup>b</sup></b><br>N=4,096 |
|---------------------------------|------------------------------------------|
| <i>Topicals<sup>c</sup></i>     | 3,325 (81.2)                             |
| Corticosteroids                 | 3,277 (80.0)                             |
| Class I                         | 1,867 (45.6)                             |
| Non-Class I                     | 2,477 (60.5)                             |
| Calcineurin inhibitors          | 107 (2.6)                                |
| Vitamin D analogs               | 556 (13.6)                               |
| Retinoids                       | 22 (0.54)                                |
| <i>Phototherapy</i>             | 316 (7.7)                                |
| Psoralen plus Ultraviolet A     | 35 (0.85)                                |
| <i>Excimer laser</i>            | 127 (3.1)                                |
| <i>Oral systemics</i>           | 468 (11.4)                               |
| Methotrexate                    | 384 (9.4)                                |
| Cyclosporine                    | 21 (0.51)                                |
| Acitretin                       | 80 (2.0)                                 |
| <i>Biologics<sup>d</sup></i>    | 351 (8.6)                                |
| Part B (physician-administered) | 100 (2.4)                                |
| Infliximab                      | 65 (1.6)                                 |
| Ustekinumab                     | 33 (0.81)                                |
| Part D (self-injectables)       | 286 (7.0)                                |
| Adalimumab                      | 126 (3.1)                                |
| Etanercept                      | 160 (3.9)                                |

<sup>a</sup>Psoriasis is defined by at least one inpatient or outpatient claim for psoriasis (ICD-9-CM 696.1) by a dermatologist.

<sup>b</sup>Percentages do not equal 100 because patients may have received more than one therapy.

<sup>c</sup>Coal tar/anthralin and salicylic acid use were each examined but not reported separately per CMS data use agreement due to cell size of 10 or less.

<sup>d</sup>Alefacept was examined but not reported separately per CMS data use agreement due to cell size of 10 or less.

**Supplementary Table 3. Psoriasis Severity**

| <b>Severity Defined by Therapy</b>                   | <b>Number (%)<sup>a</sup></b><br>N = 4,096 |
|------------------------------------------------------|--------------------------------------------|
| <b>Mild</b> (n=3,029; 74.0%)                         |                                            |
| No therapy                                           | 553 (18.3) <sup>b</sup>                    |
| Topicals only                                        | 2,476 (81.7) <sup>b</sup>                  |
| <b>Moderate to Severe<sup>c</sup></b> (n=981; 24.0%) |                                            |
| Phototherapy                                         | 316 (32.2) <sup>d</sup>                    |
| Oral Systemics                                       | 468 (47.7) <sup>d</sup>                    |
| Methotrexate                                         | 384 (39.1) <sup>d</sup>                    |
| Cyclosporine                                         | 21 (2.1) <sup>d</sup>                      |
| Acitretin                                            | 80 (8.2) <sup>d</sup>                      |
| Biologics                                            | 351 (35.8) <sup>d</sup>                    |
| Adalimumab                                           | 126 (12.8) <sup>d</sup>                    |
| Etanercept                                           | 160 (16.3) <sup>d</sup>                    |
| Infliximab                                           | 65 (6.6) <sup>d</sup>                      |
| Ustekinumab                                          | 33 (3.4) <sup>d</sup>                      |
| <b>Unknown</b> (n=86; 2.1%)                          |                                            |

<sup>a</sup>Percentages do not equal 100 because patients may have received more than one therapy.

<sup>b</sup>Percentages are calculated amongst those with mild psoriasis.

<sup>c</sup>Alefacept was included as a biologic therapy to identify moderate to severe psoriasis but not reported separately per CMS data use agreement due to cell size of 10 or less.

<sup>d</sup>Percentages are calculated amongst those with moderate to severe psoriasis.

**Supplementary Table 4. Factors Associated with Biologic Use Among Patients Receiving Therapy Indicated for Moderate to Severe Psoriasis<sup>a</sup>**

| Characteristic                                              | Adjusted Odds Ratio <sup>b</sup> | 95% Confidence Interval |
|-------------------------------------------------------------|----------------------------------|-------------------------|
| <i>Factors Associated with Greater Odds of Biologic Use</i> |                                  |                         |
| Dermatology Provider Density                                | 1.08                             | 1.01-1.17               |
| Inflammatory Bowel Disease <sup>c</sup>                     | 12.1                             | 2.26-64.8               |
| Psoriatic Arthritis <sup>c</sup>                            | 4.00                             | 2.73–5.87               |
| <i>Factors Associated with Lower Odds of Biologic Use</i>   |                                  |                         |
| Primary Care Provider Density                               | 0.90                             | 0.84-0.97               |
| Absence of Part D Low-Income Subsidy <sup>d</sup>           | 0.27                             | 0.16–0.44               |
| Black <sup>e</sup>                                          | 0.30                             | 0.15–0.63               |
| Cancer <sup>c</sup>                                         | 0.45                             | 0.27–0.74               |
| Dementia <sup>c</sup>                                       | 0.09                             | 0.01-0.55               |

<sup>a</sup>Moderate to severe psoriasis is identified by receipt of either phototherapy, oral systemic or biologic.

<sup>b</sup>Based on multivariable logistic regression model including the following covariates: age, sex, race, census region of residence, county-level per-capita income, county-level poverty rate, county-level urban versus rural status, county-level low educational level, density of dermatologists and adult primary care providers per number of residents in the patient's county of residence, part D plan type, low-income subsidy status, number of non-psoriasis medications, RxHCC score, and comorbid disease status including all components of Charlson comorbidity index, autoimmune diseases for which biologic therapies are indicated, cardiovascular risk factors, and aggregate of atherosclerotic outcomes.

<sup>c</sup>Reference group for each comorbidity is absence of comorbidity.

<sup>d</sup>Reference group is full Part D low-income subsidy recipients.

<sup>e</sup>Reference group is non-Latino Caucasian.
